# Supplementary material for: The oxidative potential of differently charged silver and gold nanoparticles on three human lung epithelial cell types
Source: PubMed Central journal article supplement (PMC4304186; doi:10.1186/s12951-014-0062-4), 2015-01-16

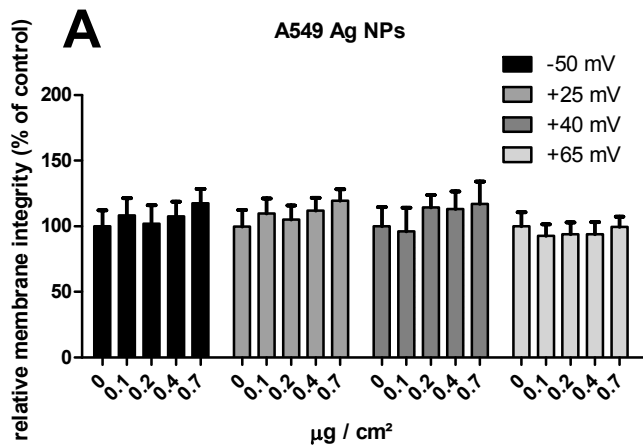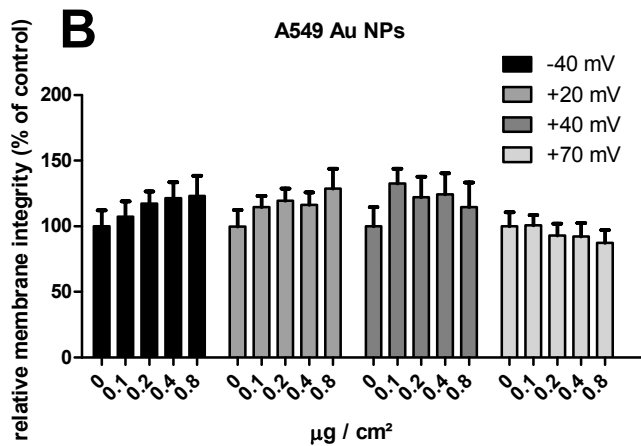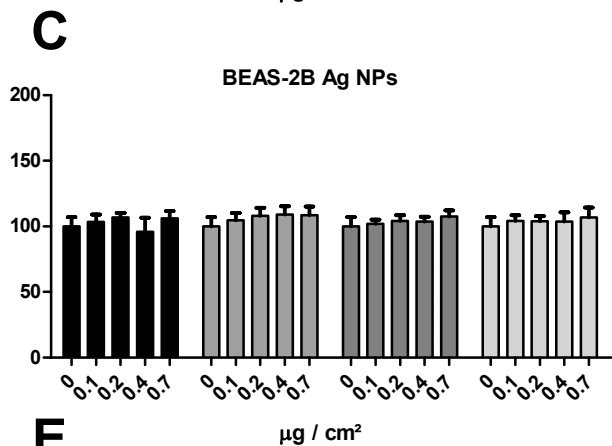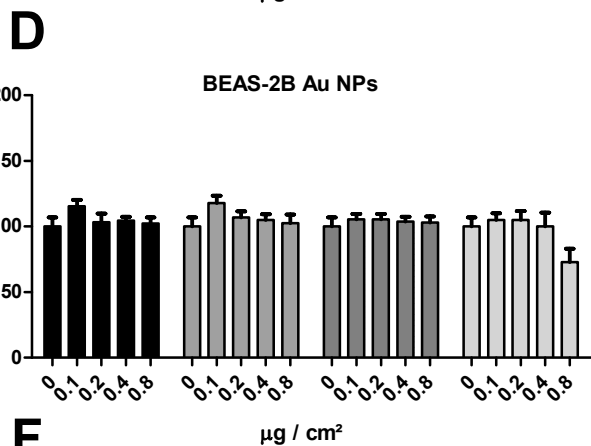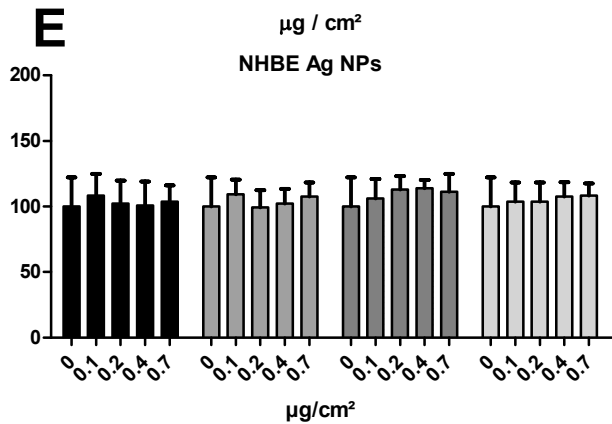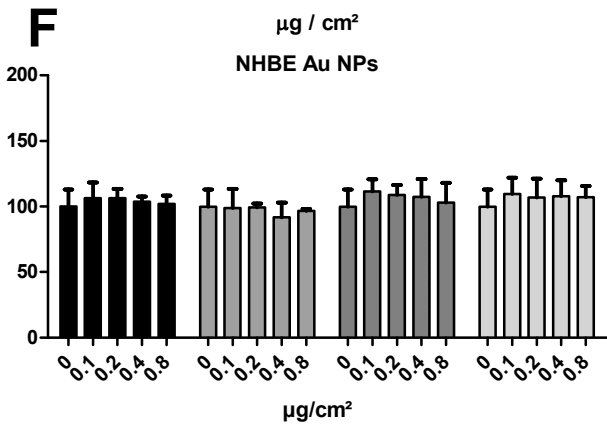

Supplement: 12951_2014_62_MOESM1_ESM.pdf [file 12951_2014_62_MOESM1_ESM.pdf]
