# Supplementary material for: The oxidative potential of differently charged silver and gold nanoparticles on three human lung epithelial cell types
Source: PubMed Central journal article supplement (PMC4304186; doi:10.1186/s12951-014-0062-4), 2015-01-16

**A****Ag NPs (1:40 dilution)**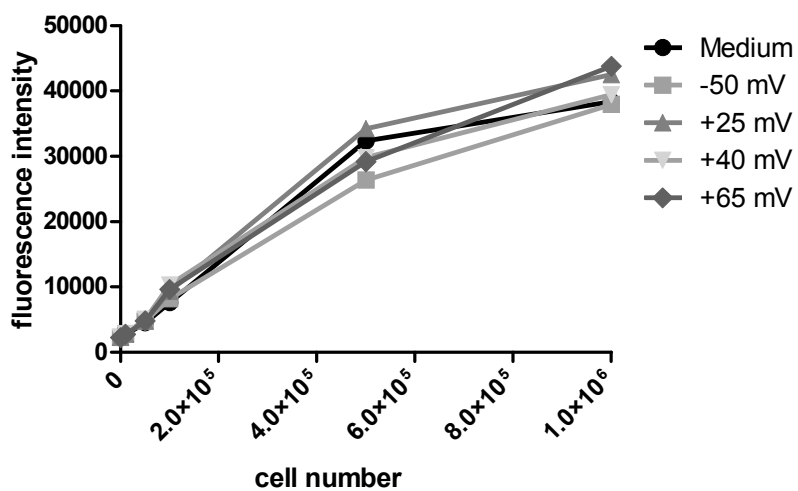**B****Ag NPs (1:10 dilution)**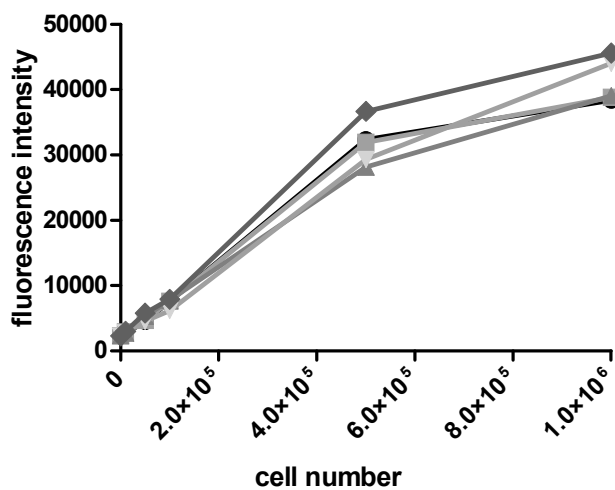**C****Au NPs (1:40 dilution)**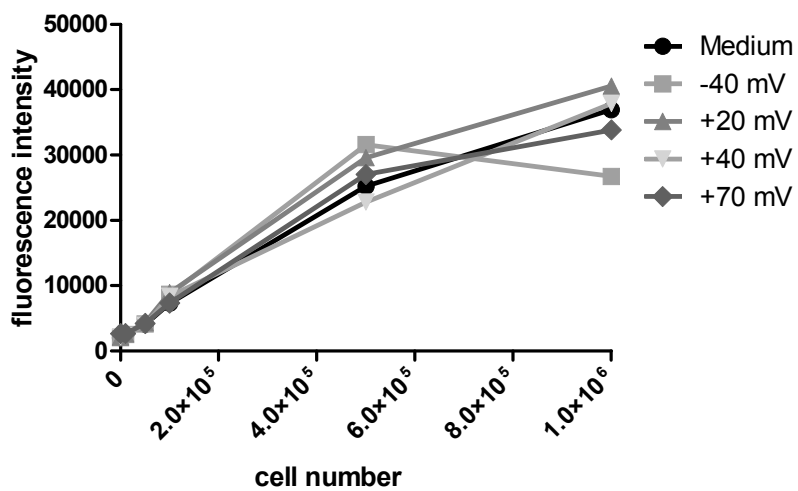**D****Au NPs (1:10 dilution)**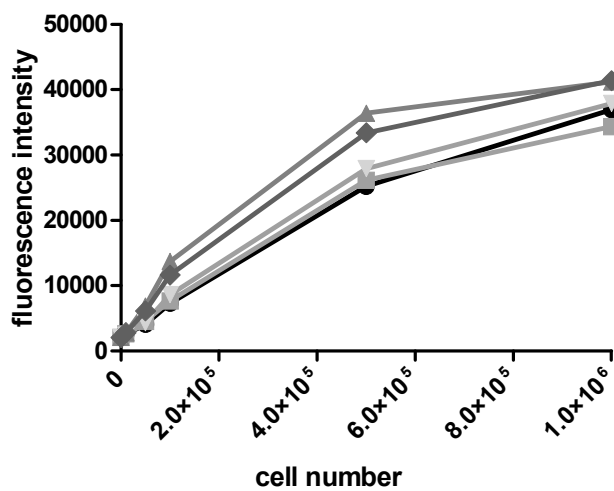

Supplement: 12951_2014_62_MOESM6_ESM.pdf [file 12951_2014_62_MOESM6_ESM.pdf]
