# Supplementary material for: The oxidative potential of differently charged silver and gold nanoparticles on three human lung epithelial cell types
Source: PubMed Central journal article supplement (PMC4304186; doi:10.1186/s12951-014-0062-4), 2015-01-16
Supplement: 12951_2014_62_MOESM9_ESM.pdf [file 12951_2014_62_MOESM9_ESM.pdf]

| Sample    | As synth | In A549<br>medium | In BEAS-2B<br>medium | In NHBE<br>medium |
|-----------|----------|-------------------|----------------------|-------------------|
| Ag-SC     | -50      | -30               | -23                  | -35               |
| Ag-CHIT-L | +25      | -15               | +21                  | -2                |
| Ag-CHIT-M | +40      | -17               | +23                  | -5                |
| Ag-CHIT-H | +65      | -6                | +30                  | +2                |
| Au-SC     | -40      | -36               | -25                  | -36               |
| Au-CHIT-L | +20      | -11               | +19                  | -5                |
| Au-CHIT-M | +40      | -13               | +16                  | -7                |
| Au-CHIT-H | +70      | -10               | +21                  | -1                |
